# Supplementary material for: Ectopic Expression of Ptf1a Induces Spinal Defects, Urogenital Defects, and Anorectal Malformations in Danforth's Short Tail Mice
Source: PubMed Central journal article supplement (PMC3578775; doi:10.1371/journal.pgen.1003204), 2013-02-21

Figure S7

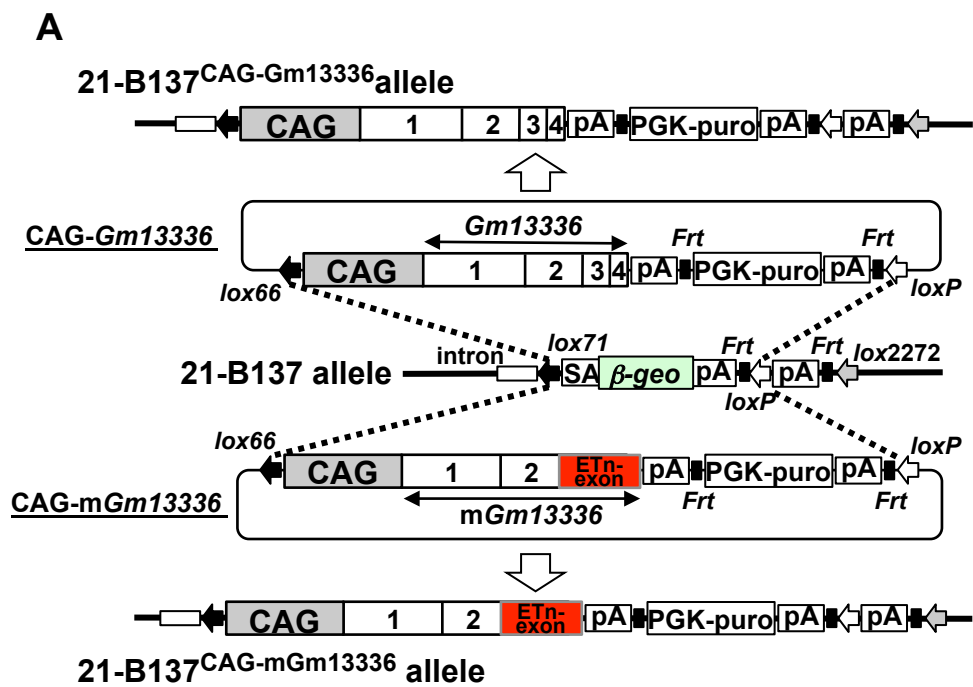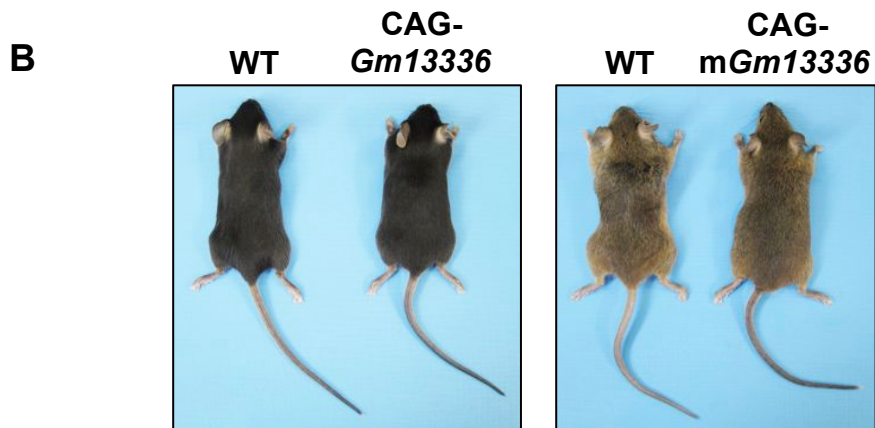

Supplement: pgen.1003204.s007.pdf [file pgen.1003204.s007.pdf]
