# Supplementary material for: Ectopic Expression of Ptf1a Induces Spinal Defects, Urogenital Defects, and Anorectal Malformations in Danforth's Short Tail Mice
Source: PubMed Central journal article supplement (PMC3578775; doi:10.1371/journal.pgen.1003204), 2013-02-21
Supplement: pgen.1003204.s010.pdf [file pgen.1003204.s010.pdf]

**Table S1.** Genes upregulated more than 1.7-fold in homozygous *Sd* embryos at embryonic day 10.0

| wt_homo_log2 | Gene Symbol          | Gene Name                                                                   |
|--------------|----------------------|-----------------------------------------------------------------------------|
| -2.292604532 | <i>Wfdc3</i>         | WAP four-disulfide core domain 3                                            |
| -2.068914981 | <i>Cpa1</i>          | carboxypeptidase A1                                                         |
| -1.886434916 | <i>Ptf1a</i>         | pancreas specific transcription factor, 1a                                  |
| -1.726093968 | <i>Unc13c</i>        | unc-13 homolog C ( <i>C. elegans</i> )                                      |
| -1.689349507 | <i>Fancg</i>         | Fanconi anemia, complementation group G                                     |
| -1.568837495 | <i>Saps2</i>         | SAPS domain family, member 2                                                |
| -1.50710034  | <i>Nhsl1</i>         | NHS-like 1                                                                  |
| -1.450641448 | <i>Gp1bb</i>         | glycoprotein Ib, beta polypeptide"                                          |
| -1.388891015 | <i>Rph3al</i>        | rabphilin 3A-like (without C2 domains)                                      |
| -1.325300288 | <i>Pramef12</i>      | PRAME family member 12                                                      |
| -1.29461986  | <i>Frmd4a</i>        | FERM domain containing 4A                                                   |
| -1.223918877 | <i>Car7</i>          | carbonic anhydrase 7                                                        |
| -1.221578043 | <i>Ikzf2</i>         | IKAROS family zinc finger 2                                                 |
| -1.125159242 | <i>Nr1d1</i>         | nuclear receptor subfamily 1, group D, member 1                             |
| -1.107857958 | <i>4930539N22Rik</i> | RIKEN cDNA 4930539N22 gene                                                  |
| -1.075506995 | <i>A530054K11Rik</i> | RIKEN cDNA A530054K11 gene                                                  |
| -1.063980849 | <i>Ugt2b34</i>       | UDP glucuronosyltransferase 2 family, polypeptide B34"                      |
| -1.049819633 | <i>Cyp3a11</i>       | cytochrome P450, family 3, subfamily a, polypeptide 11"                     |
| -1.034717782 | <i>Kirrel2</i>       | kin of IRRE like 2 ( <i>Drosophila</i> )                                    |
| -1.027210927 | <i>Slc38a9</i>       | solute carrier family 38, member 9                                          |
| -1.022209956 | <i>Luc7l2</i>        | LUC7-like 2 ( <i>S. cerevisiae</i> )                                        |
| -1.011919634 | <i>Abcb1b</i>        | ATP-binding cassette, sub-family B (MDR/TAP), member 1B"                    |
| -1.011841065 | <i>Lhx1</i>          | LIM homeobox protein 1                                                      |
| -0.964093392 | <i>Sipa111</i>       | signal-induced proliferation-associated 1 like 1                            |
| -0.943349826 | <i>Slc6a16</i>       | solute carrier family 6, member 16                                          |
| -0.942660843 | <i>Mgam</i>          | maltase-glucoamylase                                                        |
| -0.940246568 | <i>N4bp2l2</i>       | NEDD4 binding protein 2-like 2                                              |
| -0.924019703 | <i>Nsun6</i>         | NOL1/NOP2/Sun domain family member 6                                        |
| -0.92029978  | <i>3830417A13Rik</i> | RIKEN cDNA 3830417A13 gene                                                  |
| -0.917571744 | <i>Ank2</i>          | ankyrin 2, brain"                                                           |
| -0.898814256 | <i>1600015110Rik</i> | RIKEN cDNA 1600015110 gene                                                  |
| -0.890764689 | <i>LOC639910</i>     | hypothetical protein LOC639910                                              |
| -0.889616747 | <i>Madcam1</i>       | mucosal vascular addressin cell adhesion molecule 1                         |
| -0.887704018 | <i>Igsf11</i>        | immunoglobulin superfamily, member 11                                       |
| -0.885761887 | <i>Sectm1b</i>       | secreted and transmembrane 1B                                               |
| -0.881250083 | <i>Olfir870</i>      | olfactory receptor 870                                                      |
| -0.865447187 | <i>6530418L21Rik</i> | RIKEN cDNA 6530418L21 gene                                                  |
| -0.864747648 | <i>Mbnl2</i>         | muscleblind-like 2                                                          |
| -0.864663626 | <i>Cnksr2</i>        | connector enhancer of kinase suppressor of Ras 2                            |
| -0.86407026  | <i>5730409L17Rik</i> | RIKEN cDNA 5730409L17 gene                                                  |
| -0.862564645 | <i>Olfir1441</i>     | olfactory receptor 1441                                                     |
| -0.856683291 | <i>Acot4</i>         | acyl-CoA thioesterase 4                                                     |
| -0.854986982 | <i>Rbpjl</i>         | recombination signal binding protein for immunoglobulin kappa J region-like |
| -0.848077744 | <i>Slc35d3</i>       | solute carrier family 35, member D3"                                        |
| -0.84462546  | <i>Upk1a</i>         | uroplakin 1A                                                                |
| -0.84351152  | <i>Anxa7</i>         | annexin A7                                                                  |
| -0.842885702 | <i>Hrg</i>           | histidine-rich glycoprotein                                                 |
| -0.827769998 | <i>Ly6g5c</i>        | lymphocyte antigen 6 complex, locus G5C"                                    |
| -0.826120079 | <i>Gpr152</i>        | G protein-coupled receptor 152                                              |
| -0.822110043 | <i>9130022E09</i>    | hypothetical 9130022E09                                                     |
| -0.820070174 | <i>Taar4</i>         | trace amine-associated receptor 4                                           |
| -0.807713561 | <i>A230072E10Rik</i> | RIKEN cDNA A230072E10 gene                                                  |
| -0.796918159 | <i>Lhx9</i>          | LIM homeobox protein 9                                                      |
| -0.795244306 | <i>Cybrd1</i>        | cytochrome b reductase 1                                                    |
| -0.79479939  | <i>Olfir1419</i>     | olfactory receptor 1419                                                     |
| -0.789249795 | <i>Veph1</i>         | ventricular zone expressed PH domain homolog 1 (zebrafish)                  |
| -0.787280139 | <i>Fv1</i>           | Friend virus susceptibility 1                                               |
| -0.782511125 | <i>Taok2</i>         | TAO kinase 2                                                                |
| -0.781628273 | <i>Tgm5</i>          | transglutaminase 5                                                          |
| -0.77680897  | <i>RP23-212C14.7</i> | keratin associated protein 9 family member                                  |
| -0.776441136 | <i>Prm2</i>          | protamine 2                                                                 |
| -0.771651592 | <i>Cdcp1</i>         | CUB domain containing protein 1                                             |
| -0.768768275 | <i>Adrb1</i>         | adrenergic receptor, beta 1"                                                |
| -0.76817615  | <i>Tmem89</i>        | transmembrane protein 89                                                    |
| -0.767808688 | <i>Sfxn3</i>         | sideroflexin 3                                                              |
| -0.766146098 | <i>Rhox6</i>         | reproductive homeobox 6                                                     |
