# Supplementary material for: Ectopic Expression of Ptf1a Induces Spinal Defects, Urogenital Defects, and Anorectal Malformations in Danforth's Short Tail Mice
Source: PubMed Central journal article supplement (PMC3578775; doi:10.1371/journal.pgen.1003204), 2013-02-21
Supplement: pgen.1003204.s011.pdf [file pgen.1003204.s011.pdf]

**Table S2.** Genes downregulated more than 1.7-fold in homozygous *Sd* embryos at embryonic day 10.0

| wt_homo_log2 | GeneSymbol           | GeneName                                                                           |
|--------------|----------------------|------------------------------------------------------------------------------------|
| 0.766372156  | <i>Ccdc88a</i>       | coiled coil domain containing 88A                                                  |
| 0.771837649  | <i>Myf6</i>          | myogenic factor 6                                                                  |
| 0.772864656  | <i>Dgkd</i>          | diacylglycerol kinase, delta                                                       |
| 0.774188515  | <i>Rora</i>          | RAR-related orphan receptor alpha                                                  |
| 0.779194956  | <i>Ccdc148</i>       | coiled-coil domain containing 148                                                  |
| 0.792052297  | <i>Erdr1</i>         | erythroid differentiation regulator 1                                              |
| 0.793156058  | <i>LOC100047943</i>  | similar to Ina protein                                                             |
| 0.80952905   | <i>Rabggtb</i>       | RAB geranylgeranyl transferase, b subunit"                                         |
| 0.812644809  | <i>Gpx6</i>          | glutathione peroxidase 6                                                           |
| 0.814251994  | <i>2310035P21Rik</i> | RIKEN cDNA 2310035P21 gene                                                         |
| 0.833473988  | <i>Fabp1</i>         | fatty acid binding protein 1, liver                                                |
| 0.842128041  | <i>Rian</i>          | RNA imprinted and accumulated in nucleus                                           |
| 0.851771248  | <i>Tigd3</i>         | tigger transposable element derived 3                                              |
| 0.887936059  | <i>Nkx1-2</i>        | NK1 transcription factor related, locus 2 (Drosophila)"                            |
| 0.896362994  | <i>Mid1</i>          | midline 1                                                                          |
| 0.908795458  | <i>Arv1</i>          | ARV1 homolog (yeast)                                                               |
| 0.912931803  | <i>EG633640</i>      | predicted gene, EG633640                                                           |
| 0.957347792  | <i>Aldh1a3</i>       | aldehyde dehydrogenase family 1, subfamily A3"                                     |
| 1.016807594  | <i>Fzd2</i>          | frizzled homolog 2 (Drosophila)                                                    |
| 1.024433763  | <i>Lrtm1</i>         | leucine-rich repeats and transmembrane domains 1                                   |
| 1.035904587  | <i>1300002K09Rik</i> | RIKEN cDNA 1300002K09 gene                                                         |
| 1.097376463  | <i>Slc15a2</i>       | solute carrier family 15 (H+/peptide transporter), member 2                        |
| 1.134145103  | <i>Abcb10</i>        | ATP-binding cassette, sub-family B (MDR/TAP), member 10                            |
| 1.288954763  | <i>Ccdc151</i>       | coiled-coil domain containing 151                                                  |
| 1.346441658  | <i>Car3</i>          | carbonic anhydrase 3                                                               |
| 1.462164049  | <i>Cdx2</i>          | caudal type homeo box 2                                                            |
| 1.606081542  | <i>Pard3</i>         | par-3 (partitioning defective 3) homolog (C. elegans)                              |
| 1.662669172  | <i>Nkx3-1</i>        | NK-3 transcription factor, locus 1 (Drosophila)"                                   |
| 1.981420785  | <i>T</i>             | brachyury                                                                          |
| 2.011016198  | <i>Plp1</i>          | proteolipid protein (myelin) 1                                                     |
| 2.107707874  | <i>4921530L18Rik</i> | RIKEN cDNA 4921530L18 gene                                                         |
| 2.19894211   | <i>Mid1</i>          | midline 1                                                                          |
| 3.017687813  | <i>Tnfrsf14</i>      | tumor necrosis factor receptor superfamily, member 14 (herpesvirus entry mediator) |
