# Supplementary material for: Ectopic Expression of Ptf1a Induces Spinal Defects, Urogenital Defects, and Anorectal Malformations in Danforth's Short Tail Mice
Source: PLOS journal article supplement (doi:10.1371/journal.pgen.1003204), 2013-02-21

Figure S5

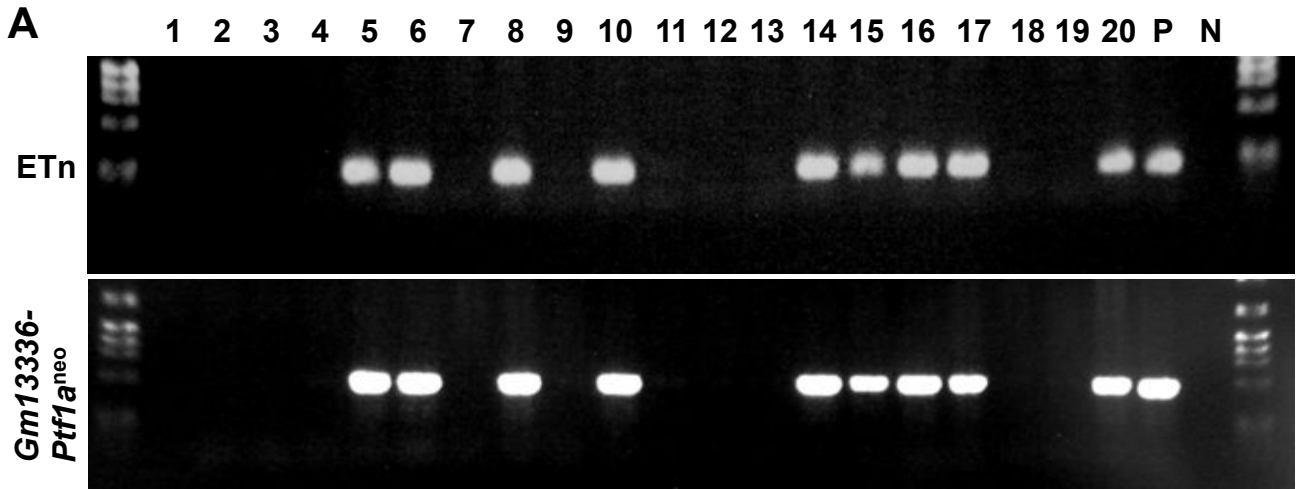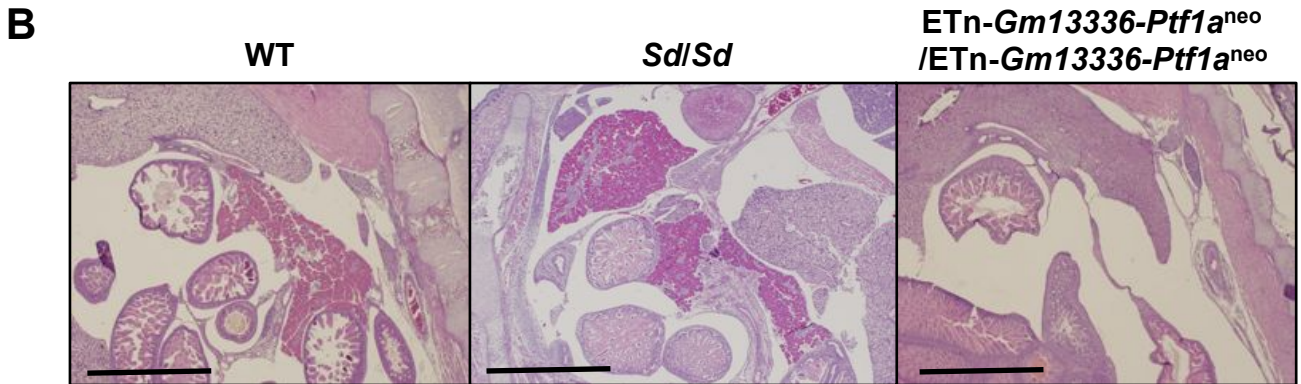

Supplement: S5 (10.1371/journal.pgen.1003204.s005) [file journal.pgen.1003204.s005]
